# Supplementary material for: Magnetic coupling modulation in meta-nitroxide-functionalized isoalloxazine magnets with redox-active units as efficient side-modulators
Source: Royal Society of Chemistry journal article supplement (doi:10.1039/d3cp01611k), 2023-01-01
Supplement: d3cp01611k1.pdf [file d3cp01611k1.pdf]

**Magnetic Coupling Modulation in Meta-Nitroxide-Functionalized Isoalloxazine Magnets  
with Redox-Active Unit as Efficient Side-Modulator**

Rabia Malik and Yuxiang Bu\*

*School of Chemistry and Chemical Engineering, Shandong University, Jinan 250100, People's  
Republic of China*

**Supporting Information**

**Contents**

- 1. Relevant Data for Describing the Ground States of All Diradicals and their  
Magnetic behaviors**
- 2. Linear Relationship between the  $J/J'$  values of all diradicals calculated at the  
B3LYP/ M06-2X with 6-311+G(d,p) basis set.**
- 3. Optimized Molecular Geometries with Corresponding Bond Lengths and Dihedral  
Angles**
- 4. SOMO Plots and Spin Density Maps for All Diradicals**
- 5. Spin Alteration Plots and Spin Density Distributions**

## 1. Relevant Data for Describing the Grounds States for All Designed Diradicals, and Their Magnetic Behaviors

**Table S1.** All estimated energies (in a.u.) of the closed shell (CS) singlet, Broken-symmetry open-shell singlet (BS), and triplet (T) state, corresponding  $\langle S^2 \rangle$  values, Magnetic Coupling Constants ( $J/\text{cm}^{-1}$ ) for all diradicals calculated at (U)B3LYP/6-311+G (d, p) level.

| Types                     | $E_{\text{(CS)}}(\text{au})$ | $E_{\text{(T)}}(\text{au}) (\langle S^2 \rangle)$ | $E_{\text{(BS)}}(\text{au}) (\langle S^2 \rangle)$ | $J$<br>( $\text{cm}^{-1}$ ) |
|---------------------------|------------------------------|---------------------------------------------------|----------------------------------------------------|-----------------------------|
| <b>1a</b>                 | -958.8540130                 | -958.8635592(2.062)                               | -958.8608718(1.011)                                | 561.3                       |
| <b>1b</b>                 | -960.1187428                 | -960.1215827(2.032)                               | -960.1269889(0.817)                                | -976.1                      |
| <b>1c</b>                 | -959.2306459                 | -959.2201800(2.032)                               | -959.2319023(0.427)                                | -1602.9                     |
| <b>1d</b>                 | -959.1898011                 | -959.2055203(2.103)                               | -959.2034475(0.903)                                | 379.1                       |
| <b>1e</b>                 | -959.4516180                 | -959.4281143(2.079)                               | -959.4516180(0.000)                                | -                           |
| <b>1b(OH)</b>             | -1035.3645946                | -1035.3677092(2.031)                              | -1035.3729327(0.824)                               | -949.8                      |
| <b>1b(NO<sub>2</sub>)</b> | -1164.6767663                | -1164.6818318(2.034)                              | -1164.6859589(0.839)                               | -757.9                      |
| <b>1b(NH<sub>2</sub>)</b> | -1015.4927989                | -1015.4962867(2.032)                              | -1015.5010931(0.830)                               | -877.6                      |

**Table S2.** The energies (in a.u.) of the broken-symmetry (BS) open-shell singlet and triplet (T) state, corresponding  $\langle S^2 \rangle$  values, intramolecular magnetic coupling constants ( $J'/\text{cm}^{-1}$ ) for all diradicals calculated at the (U)M06-2X/6-311+G(d,p) level.

| Types                     | $E_{\text{(T)}}(\text{au}) (\langle S^2 \rangle)$ | $E_{\text{(BS)}}(\text{au}) (\langle S^2 \rangle)$ | $J'$ ( $\text{cm}^{-1}$ ) |
|---------------------------|---------------------------------------------------|----------------------------------------------------|---------------------------|
| <b>1a</b>                 | -958.499891(2.073)                                | -958.4973545(1.029)                                | 533.2                     |
| <b>1b</b>                 | -959.753139(2.046)                                | -959.7563254(0.966)                                | -647.5                    |
| <b>1c</b>                 | -958.8483421(2.059)                               | -958.8568787(0.677)                                | -1355.7                   |
| <b>1d</b>                 | -958.8307407(2.153)                               | -958.8272419(1.014)                                | 674.2                     |
| <b>1e</b>                 | -959.0439509(2.157)                               | -959.0726533(0.000)                                | -                         |
| <b>1b(OH)</b>             | -1034.9770312(2.046)                              | -1034.9800542(0.969)                               | -616.0                    |
| <b>1b(NO<sub>2</sub>)</b> | -1164.2384853(2.046)                              | -1164.2411165(0.972)                               | -537.7                    |
| <b>1b(NH<sub>2</sub>)</b> | -1015.1083185(2.046)                              | -1015.1106948(0.975)                               | -486.9                    |

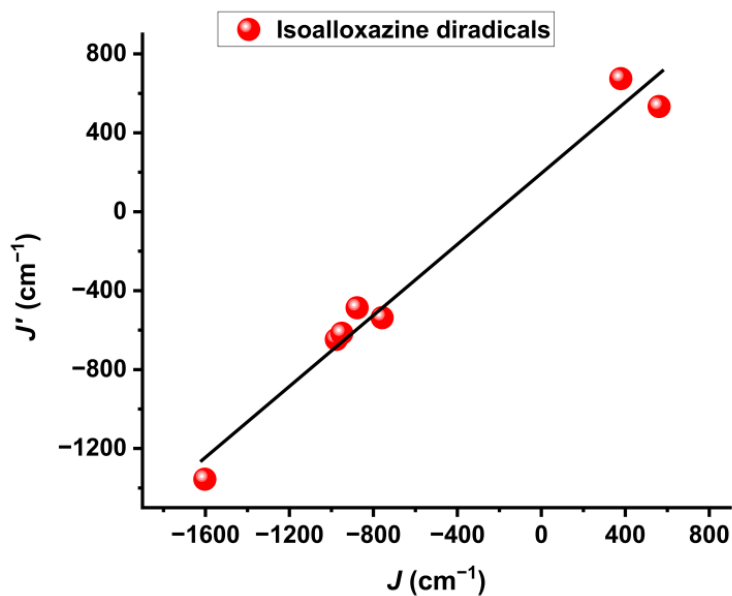

**Figure S1.** A linear correlation between the  $J$  values of selected all diradicals calculated at the B3LYP/6-311+G(d,p) level and those ( $J'$  values) calculated at the M06-2X/6-311+G(d,p) level.

**Table S3.** All calculated energies of open-shell singlet (BS) and triplet (T) states, along with  $\langle S^2 \rangle$  values, Magnetic Coupling Constants ( $J/\text{cm}^{-1}$ ) for all diradicals as well as singlet-triplet energy gaps ( $\Delta E_{\text{ST}}$ ) at the (U)B3LYP/6-311+G (d, p) level.

| Types                     | $E_{(T)} (\langle S^2 \rangle)$<br>(au) | $E_{(BS)} (\langle S^2 \rangle)$<br>(au) | $J$<br>( $\text{cm}^{-1}$ ) | $\Delta E_{\text{ST}}$<br>(kcal/mol) |
|---------------------------|-----------------------------------------|------------------------------------------|-----------------------------|--------------------------------------|
| <b>1a</b>                 | -958.8635592(2.062)                     | -958.8608718(1.011)                      | 561.3                       | 3.30                                 |
| <b>1b</b>                 | -960.1215827(2.032)                     | -960.1269889(0.817)                      | -976.1                      | -5.67                                |
| <b>1c</b>                 | -959.2201800(2.032)                     | -959.2319023(0.427)                      | -1602.9                     | -9.31                                |
| <b>1d</b>                 | -959.2055203(2.103)                     | -959.2034475(0.903)                      | 379.1                       | 2.27                                 |
| <b>1b(OH)</b>             | -1035.3677092(2.031)                    | -1035.3729327(0.824)                     | -949.8                      | -5.51                                |
| <b>1b(NO<sub>2</sub>)</b> | -1164.6818318(2.034)                    | -1164.6859589(0.839)                     | -757.9                      | -4.40                                |
| <b>1b(NH<sub>2</sub>)</b> | -1015.4962867(2.032)                    | -1015.5010931(0.830)                     | -877.6                      | -5.09                                |

**Table S4.** Two SOMO Energies ( $E_s$ , in au) of the Triplet States, SOMO-SOMO Energy Gaps ( $\Delta E_{SS}$ , in eV), Calculated at the (U)B3LYP/6-311+G (d, p) level

| Types                     | $^1E_s$ (au) | $^2E_s$ (au) | $\Delta E_{SS}$ (eV) | $\Delta E_{ST}$ (kcal/mol) |
|---------------------------|--------------|--------------|----------------------|----------------------------|
| <b>1a</b>                 | -0.27067     | -0.25084     | 0.54                 | 3.30                       |
| <b>1b</b>                 | -0.23635     | -0.19035     | 1.25                 | -5.67                      |
| <b>1c</b>                 | -0.43986     | -0.38946     | 1.37                 | -9.31                      |
| <b>1d</b>                 | -0.41615     | -0.38425     | 0.86                 | 2.27                       |
| <b>1b(OH)</b>             | -0.23573     | -0.18813     | 1.29                 | -5.51                      |
| <b>1b(NO<sub>2</sub>)</b> | -0.25381     | -0.21023     | 1.18                 | -4.40                      |
| <b>1b(NH<sub>2</sub>)</b> | -0.23279     | -0.18894     | 1.19                 | -5.09                      |

## 2. Optimized Molecular Geometries with Corresponding Bond Lengths

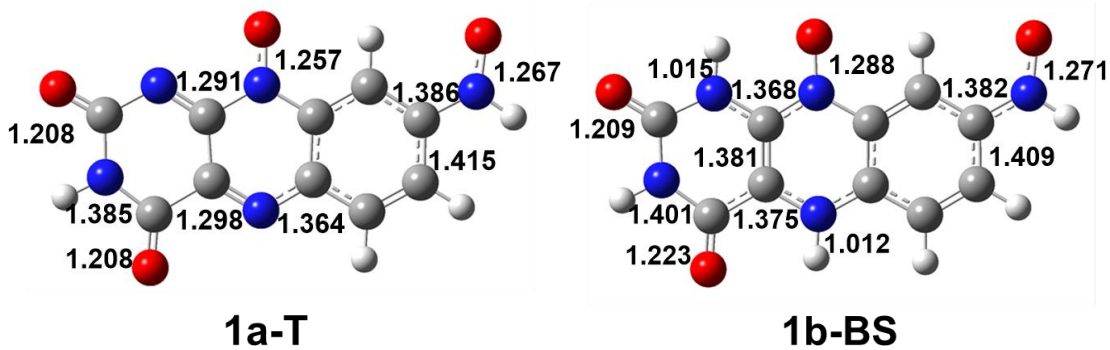

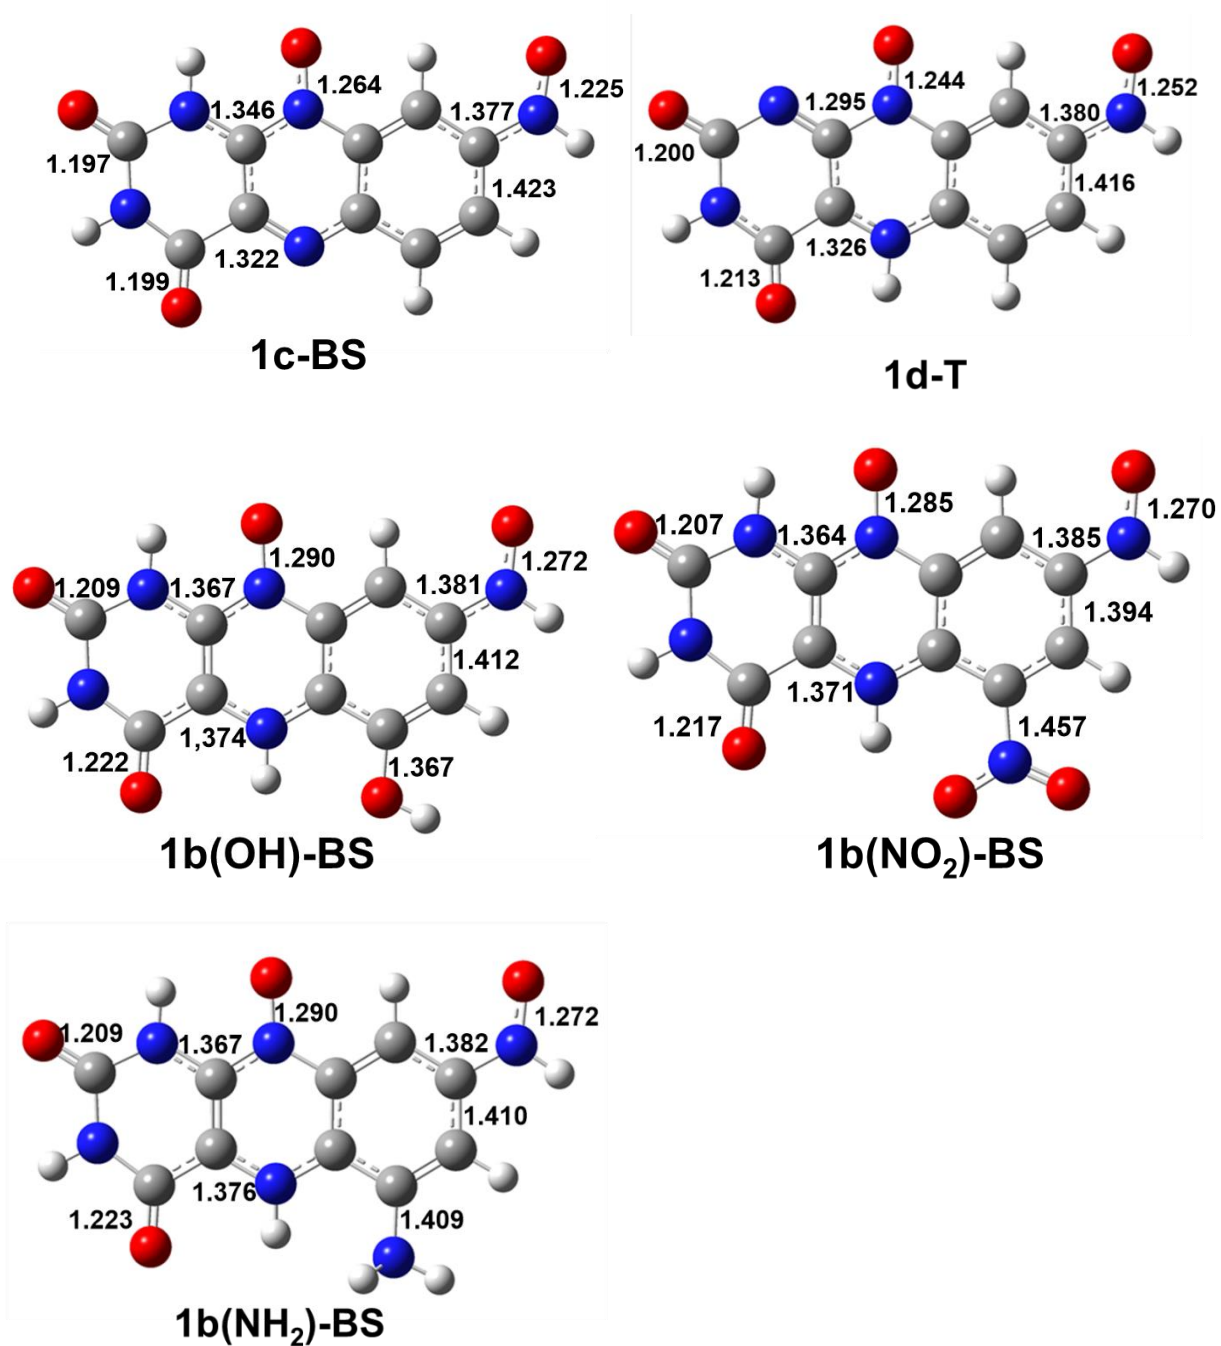

**Figure S2.** The ball-and-stick models for the optimized geometries of all diradicals with the calculated magnetic exchange spin coupling constants ( $J/\text{cm}^{-1}$ ). White spheres denote H atoms, gray, C atoms, blue, N atoms and red, O atoms.

### 3. SOMO Plots and Spin Density Maps for All Diradicals

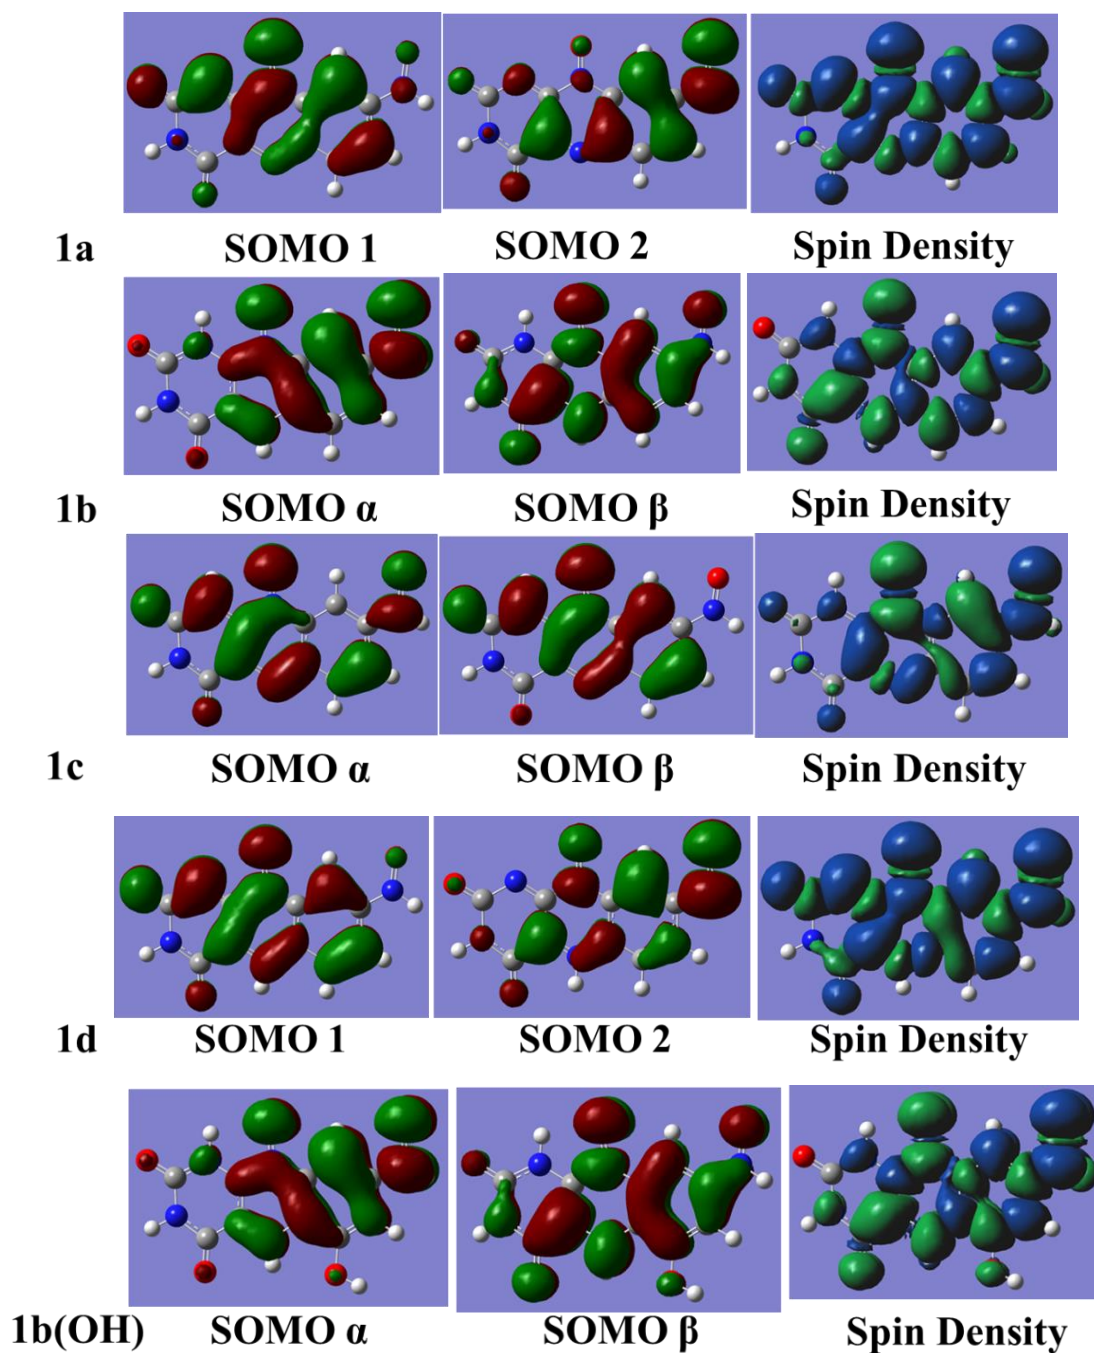

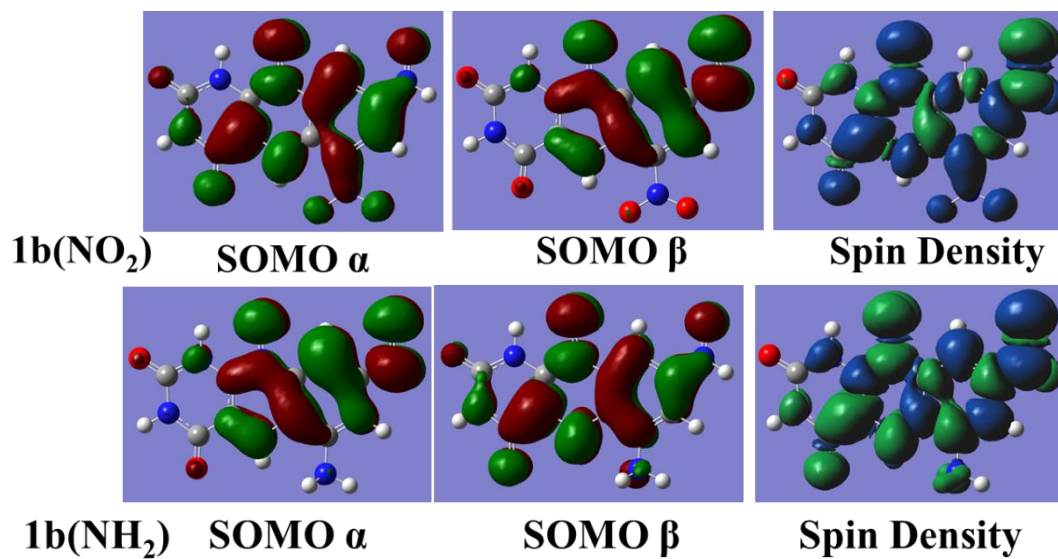

**Figure S3.** The SOMOs (isovalue = 0.02) and spin density maps (isovalue = 0.0004) for the T and BS states of all diradicals at the (U)B3LYP/6-311+G (d, p) level.

#### 4. Spin Alternation Plots and Spin Density Distributions

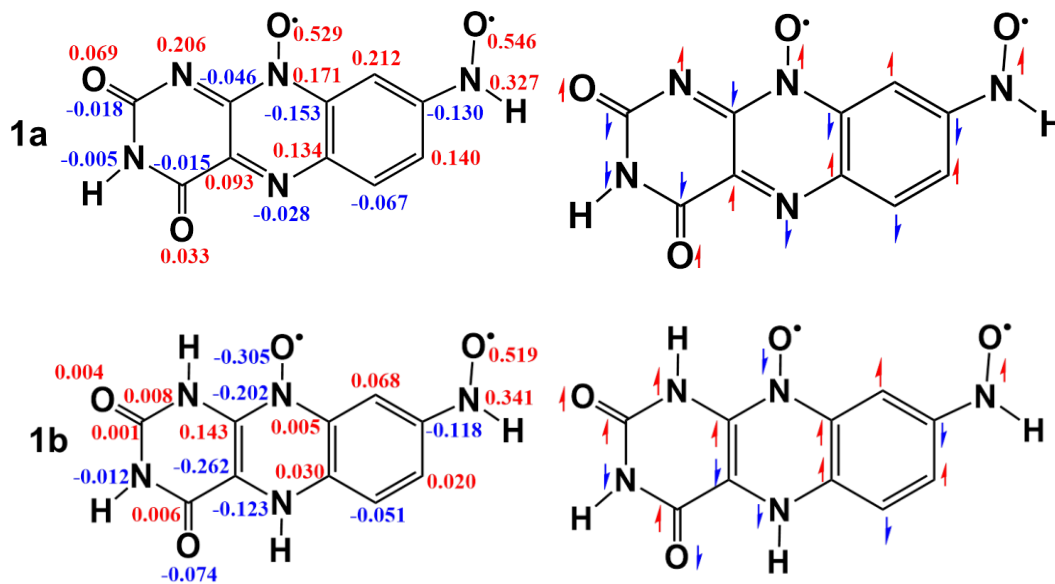

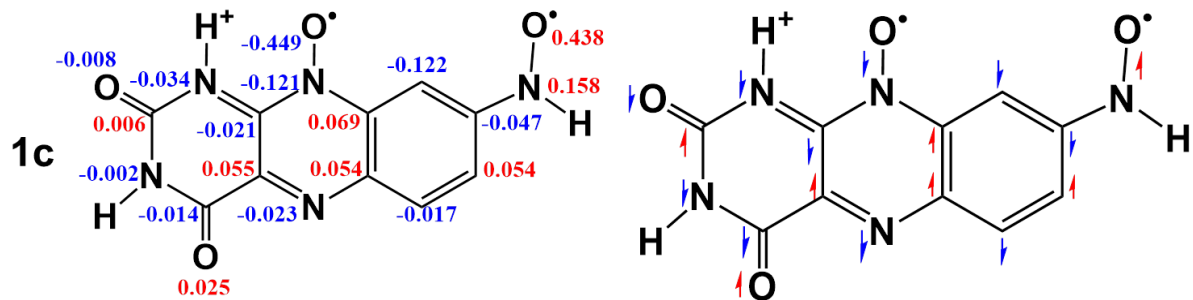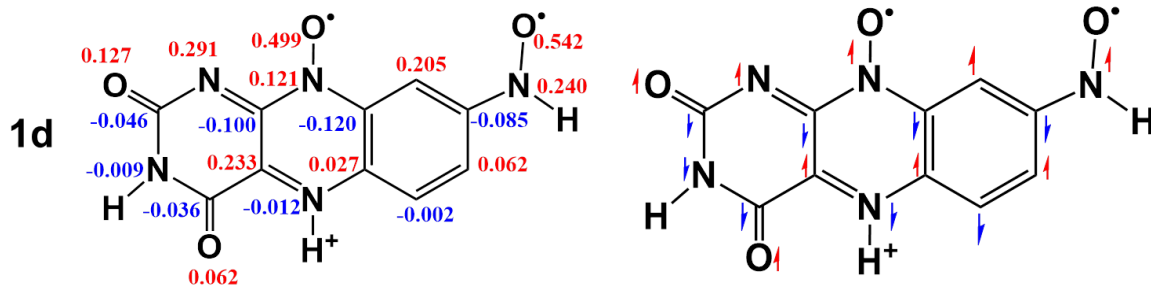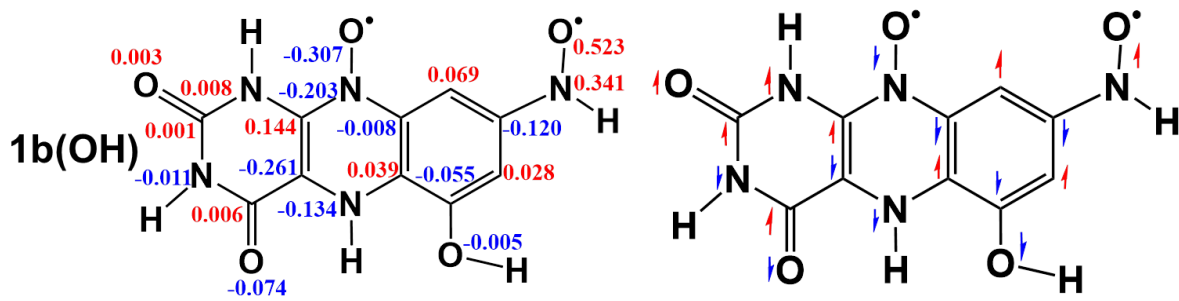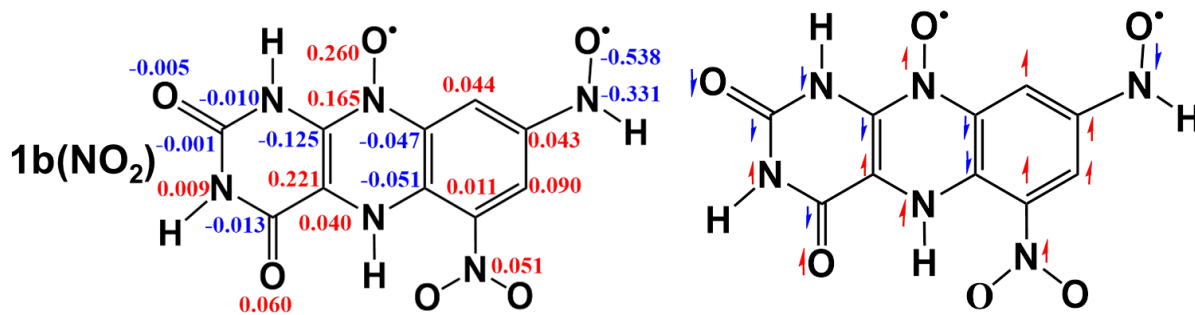



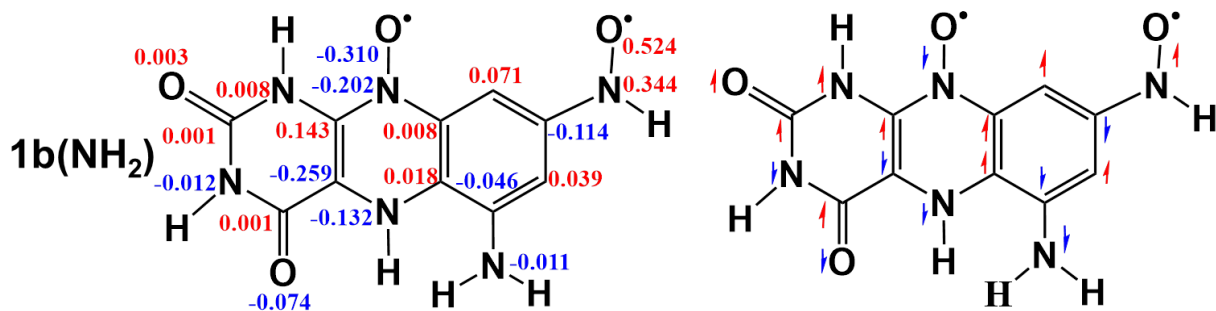

**Figure S4.** Spin density distributions (the left column, numbers) and scheme of spin alternation (the right column, up and down arrows) for all diradicals.
